# Supplementary material
Source: HighWire-hosted journal article supplement (https://gh.bmj.com/content/5/11/e003699)
Supplement: inline-supplementary-material-3 [file inline-supplementary-material-3.pdf]

### Supplement 3: WICID Framework – comprehensive Version 1.0

Table S4: Criteria and aspects within (comprehensive form).

| critereon                                                                                                      | Aspect                                                                                                                                                                                                                                                                                                                                                                                                                                                      |
|----------------------------------------------------------------------------------------------------------------|-------------------------------------------------------------------------------------------------------------------------------------------------------------------------------------------------------------------------------------------------------------------------------------------------------------------------------------------------------------------------------------------------------------------------------------------------------------|
| implications of the measures for the course of the SARS-CoV-2 pandemic and the health consequences of COVID-19 | <b>Implications of the measures for the number of new infections and the course of the pandemic;</b> including the currently existing risk of infection and the effects of the measures on COVID-19-related risk behavior (e.g. compliance with individual protective measures)                                                                                                                                                                             |
|                                                                                                                | <b>Implications of the measure for COVID-19-related health consequences at population level</b> (including number of severe disease courses, long-term health impairments, and COVID-19-related deaths)                                                                                                                                                                                                                                                     |
|                                                                                                                | Impact of the measure on the relationship between the need and availability of resources of the health care system for the medical care of severe COVID-19 cases (e.g. hospital capacities, respiratory care places) with regard to the consequences of <b>overburdening the health care system</b> (including pandemic development with the risk of reaching the exposure limit, level of exposure limit and consequences of exceeding the exposure limit) |
|                                                                                                                | Implications of the measures for the <b>direct health risk</b> (probability of illness & consequences) <b>of individuals</b>                                                                                                                                                                                                                                                                                                                                |
| Restrictions imposed on individuals and implications for quality of life, social well-being, and mental health | <b>Restrictions imposed</b> by the measures <b>on individuals</b> and the effects of the measures on the capability of shaping life and everyday life according to one's own wishes and needs                                                                                                                                                                                                                                                               |
|                                                                                                                | Implications of the measures for the <b>quality of life, self-efficacy and sense of coherence</b> (including the experience of comprehensibility, controllability and meaningfulness)                                                                                                                                                                                                                                                                       |
|                                                                                                                | Implications of the measures for the <b>social well-being of individuals</b> (e.g. with regard to social isolation, the experience of loneliness, the possibility of social interaction and exchange or the experience of social embedding and one's own role in the social community)                                                                                                                                                                      |
|                                                                                                                | Implications of the measures for <b>social cohesion of communities</b> (including partnerships, families, social communities)                                                                                                                                                                                                                                                                                                                               |
|                                                                                                                | Implications of the measures for the <b>experience of fear and insecurity</b> (e.g. fear of unemployment, existential fears, fear of infection, concern for relatives)                                                                                                                                                                                                                                                                                      |
|                                                                                                                | Implications of the measures for <b>stress, stressors, the feeling of being overwhelmed and overloaded</b> (including the effects on resilience factors and coping mechanisms)                                                                                                                                                                                                                                                                              |
|                                                                                                                | Implications of the measures for <b>mental health and its consequences</b> (e.g. depression, anxiety disorder, suicides)                                                                                                                                                                                                                                                                                                                                    |
| Implications of the measures for the physical health beyond the burden of disease from COVID-19                | Implications of the measures for <b>health-related behavior</b> (e.g. physical activity, nutrition, alcohol abuse, tobacco consumption, use of other illicit drugs) and its consequences for health                                                                                                                                                                                                                                                         |
|                                                                                                                | Implications of the measures for the <b>availability, accessibility, acceptability, and quality of medical care in emergency and standard care beyond COVID-19;</b> including the health consequences resulting from the absence, delay and poorer quality of medical treatment                                                                                                                                                                             |
|                                                                                                                | Implications of the measures for the <b>availability, accessibility, acceptability and quality of care and other health and social support services;</b> including the consequences of any lack of care, delays and poorer quality                                                                                                                                                                                                                          |
|                                                                                                                | Implications of the measures for the <b>exposure to environments that affect health</b> (e.g. exposure to unhygienic conditions, air pollution)                                                                                                                                                                                                                                                                                                             |
|                                                                                                                | Implications of the measures for the <b>risk of suffering accidents</b> (including accidents or poisoning in the domestic environment) <b>or being affected by violence</b> (including domestic violence)                                                                                                                                                                                                                                                   |
| Proportionality, and implications of the measures for individual autonomy,                                     | Implications of the measures for and accordance of the measures with <b>autonomy and individual self-determination;</b> including privacy and informational self-determination                                                                                                                                                                                                                                                                              |
|                                                                                                                | Implications of the measures for and consistency of the measures with the capability of exercising <b>individual liberties and fundamental rights</b> (including e.g. freedom of assembly, freedom of occupation and property, freedom of movement and general freedom of movement, freedom of religion)                                                                                                                                                    |

|                                                                                            |                                                                                                                                                                                                                                                                                                                                                                                                                           |
|--------------------------------------------------------------------------------------------|---------------------------------------------------------------------------------------------------------------------------------------------------------------------------------------------------------------------------------------------------------------------------------------------------------------------------------------------------------------------------------------------------------------------------|
| <b>liberties, and fundamental rights</b>                                                   | Extent of <b>intrusiveness</b> and <b>proportionality</b> with regard to the expected benefits (e.g. possibility to achieve similar benefits with less intrusive measures or to reduce the number of people affected by them through greater differentiation)                                                                                                                                                             |
| <b>Acceptance of and willingness to implement the measures</b>                             | <b>Acceptability</b> of the measures (incl. acceptance of the expected balance of benefits and burdens and their distribution for oneself and with regard to society)                                                                                                                                                                                                                                                     |
|                                                                                            | Implications of the measures for the <b>comprehension of and willingness to implement, comply with, and enforce the measures</b>                                                                                                                                                                                                                                                                                          |
| <b>Implications for equity, equality and the fair distribution of benefits and burdens</b> | Implications of the measures for <b>health, social and economic inequalities</b>                                                                                                                                                                                                                                                                                                                                          |
|                                                                                            | Health, social and <b>economic implications of the measures for individual social groups</b> , in particular <b>vulnerable and socially disadvantaged populations</b> , including the effects on relief facilities and institutions                                                                                                                                                                                       |
|                                                                                            | <b>Degree to which benefits and burdens resulting from the measures</b> (health, social, economic) are distributed <b>fairly between different actors and population groups</b> ; including those with high or low expected benefits and those with high or negligible burdens from the measures                                                                                                                          |
|                                                                                            | <b>Accordance of the measures with the principle of equal treatment</b> ; in the sense of avoiding and reducing unjustified unequal treatment                                                                                                                                                                                                                                                                             |
|                                                                                            | Implications of the measures for the occurrence, spread and consequences of <b>stigmatization</b> ; including the risk that persons, groups of persons or other actors face <b>discrimination</b> or are otherwise socially disadvantaged by the measures (including their compliance and non-compliance)                                                                                                                 |
| <b>Societal and environmental implications and considerations</b>                          | <b>Implications of the measures for actors and institutions of civil society, social life, and culture</b> (e.g. restriction of the activities of associations, youth clubs, or place of worship etc. and the resulting consequences resulting from this for the affected actors and institutions)                                                                                                                        |
|                                                                                            | <b>Implications of the measures for the civil society, social life and culture</b> (including availability, accessibility, participation, acceptability, quality of offers and activities) including the reversibility of the consequences                                                                                                                                                                                |
|                                                                                            | Implications of the of the measures for <b>social cohesion, solidarity and the risk of social and political division</b>                                                                                                                                                                                                                                                                                                  |
|                                                                                            | Implications of the measure for <b>the economic situation of individuals and the resulting effects on social participation</b> ; both on the side of available income and assets (consequences of short-time work, unemployment, loss of savings and pension provision) and on the side of expenditures (additional expenditure and additional financial burdens, e.g. through protective measures, mobility, etc.)       |
|                                                                                            | implications of the measures for <b>education and psychosocial development</b> ; including aspects of availability, accessibility, acceptability and quality of educational opportunities, and irreversibility caused by the lack thereof                                                                                                                                                                                 |
|                                                                                            | implications of the measures of other <b>social determinants of health</b>                                                                                                                                                                                                                                                                                                                                                |
|                                                                                            | implications of the measures for the <b>ecosystem and planetary boundaries</b> and compatibility of the measures with the principle of environmental sustainability                                                                                                                                                                                                                                                       |
| <b>Economic implications and consideration</b>                                             | <b>Consequences of the measures for individual companies, sectors of the economy and other economic actors</b> and their capability for economic activities (e.g. through restrictions on the economic activity itself, the interruption of production chains, the availability of personnel, or sales opportunities at home and abroad) including the reversibility of the consequences (e.g. avoidance of insolvencies) |
|                                                                                            | <b>Implications of the measure for the national and regional economy</b> , its resilience, the risk of recession and the possibility of recovery after the crisis (including planning security, willingness to invest, confidence in the future or the risk of hostile takeovers)                                                                                                                                         |
|                                                                                            | <b>implications of the measures for innovation and economic development opportunities</b>                                                                                                                                                                                                                                                                                                                                 |
|                                                                                            | <b>Implications of the measures on the retention and release of labor forces</b> ; including the restriction or enabling of economic activity and its predictability                                                                                                                                                                                                                                                      |

|                                                                                                         |                                                                                                                                                                                                                    |
|---------------------------------------------------------------------------------------------------------|--------------------------------------------------------------------------------------------------------------------------------------------------------------------------------------------------------------------|
| <b>Requirements of, availability of, and implications for the availability and quality of resources</b> | <b>Financial costs, available financial resources, and budgetary implications of the measure for different actors</b>                                                                                              |
|                                                                                                         | <b>Requirements of, availability of, and implications for availability and qualification of human resources</b>                                                                                                    |
|                                                                                                         | <b>Requirements of, availability of, and implications for availability and quality of protective equipment, hygiene products and medical devices needed for the medical care of COVID-19 patients</b>              |
|                                                                                                         | <b>Requirements of, availability of, and implications for availability and quality of infrastructure (physical and institutional) to implement, enforce and monitor measures</b>                                   |
|                                                                                                         | <b>Requirements of, availability of, and implications for availability and quality of further infrastructures, technical devices, and resources (e.g. logistics infrastructure, premises, technical equipment)</b> |
| <b>Feasibility implications and considerations</b>                                                      | <b>Political feasibility and legal conformity of the measures</b>                                                                                                                                                  |
|                                                                                                         | <b>Practical and technical feasibility of the measures (including the possibility of implementing and adhering to protective measures)</b>                                                                         |
|                                                                                                         | <b>Flexibility in implementation, extension, adjustment and withdrawal of measures</b>                                                                                                                             |
|                                                                                                         | <b>Possibility of evaluation &amp; continuous monitoring of the implications of the measures, including the possibility to react adequately to new information (e.g. possibility of contact tracing, etc.)</b>     |
| <b>Interaction with and implications for components of the health system</b>                            | <b>Interaction, collision &amp; synergies of the measures with other measures to control and contain the SARS-CoV-2 pandemic</b>                                                                                   |
|                                                                                                         | <b>Interaction, collision &amp; synergies of the measures with other measures or components of the health care system without direct relation to control and containment of the SARS-CoV-2 pandemic</b>            |
|                                                                                                         | <b>Implications of the measures for the capability and willingness to develop alternative, local solutions and strategies to handle the risk of SARS-CoV-2 (e.g. for the safe re-opening of restaurants)</b>       |
| Quality of Evidence                                                                                     |                                                                                                                                                                                                                    |
